# Supplementary material for: Region-Based Association Analysis of Human Quantitative Traits in Related Individuals
Source: PubMed Central journal article supplement (PMC3684601; doi:10.1371/journal.pone.0065395), 2013-06-17
Supplement: pone.0065395.s001.pdf [file pone.0065395.s001.pdf]

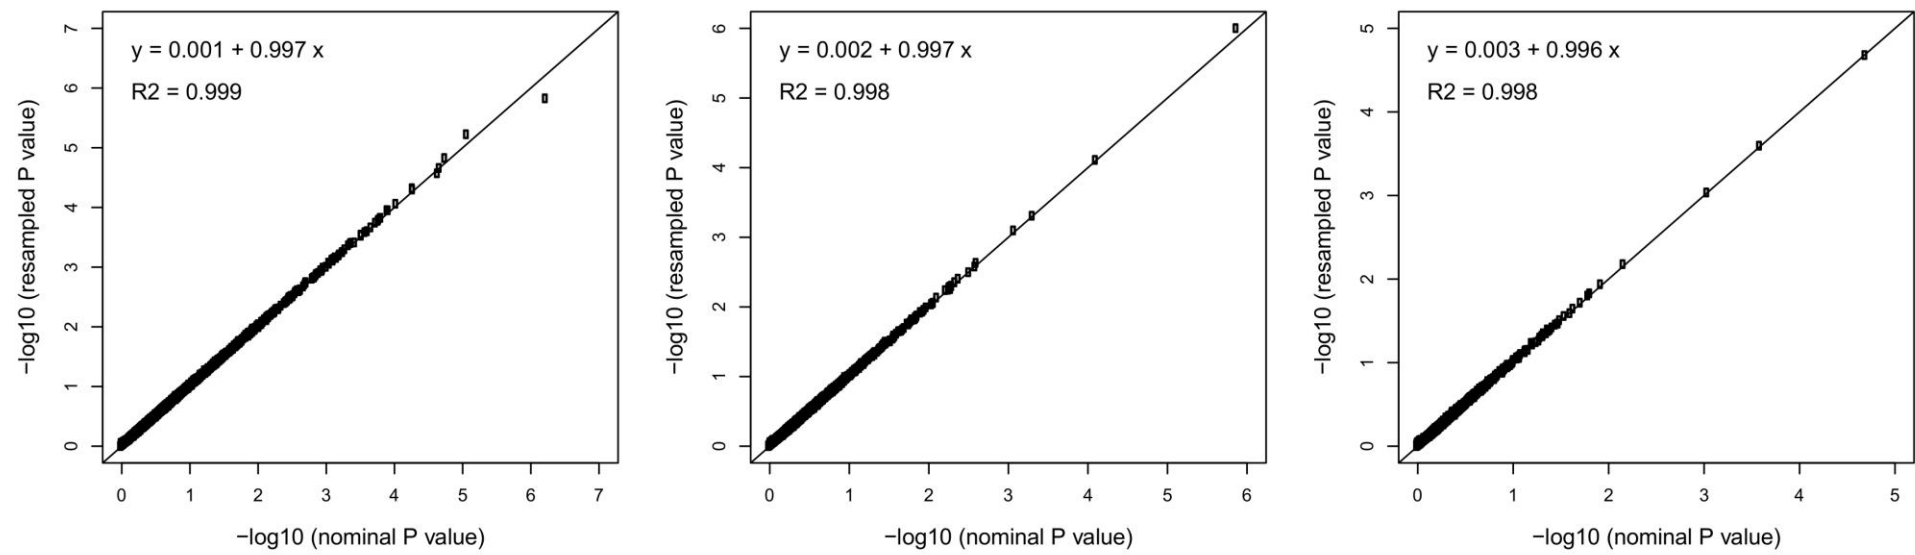

**Figure S1. Nominal versus resampling  $P$  value for different trait variants.** Left panel: the original trait; central panel: GRAMMAR+ trait transformation; right panel: environmental residuals. The number of resampling was set as  $1000/(P \text{ value})$  with upper limit of  $10^6$ .
