# Supplementary material for: Region-Based Association Analysis of Human Quantitative Traits in Related Individuals
Source: PubMed Central journal article supplement (PMC3684601; doi:10.1371/journal.pone.0065395), 2013-06-17
Supplement: pone.0065395.s002.pdf [file pone.0065395.s002.pdf]

**Table S1. Type I errors for three GAW17 traits analyzed with SKAT.**

| Weights*  | Trait presentation      | Proportion of $P$ values $\leq \alpha$ |        |        |                 |        |        |
|-----------|-------------------------|----------------------------------------|--------|--------|-----------------|--------|--------|
|           |                         | $\alpha = 0.05$                        |        |        | $\alpha = 0.01$ |        |        |
|           |                         | Q1                                     | Q2     | Q4     | Q1              | Q2     | Q4     |
| (0.5,0.5) | original trait          | 0.2168                                 | 0.1645 | 0.2506 | 0.0952          | 0.0580 | 0.1111 |
|           | original trait, no PC   | 0.3803                                 | 0.2402 | 0.3291 | 0.2402          | 0.1069 | 0.1740 |
|           | GRAMMAR+                | 0.0572                                 | 0.0542 | 0.0490 | 0.0148          | 0.0114 | 0.0097 |
|           | GRAMMAR+, no PC         | 0.0857                                 | 0.0557 | 0.0489 | 0.0287          | 0.0124 | 0.0098 |
|           | envir. residuals        | 0.0121                                 | 0.0168 | 0.0062 | 0.0016          | 0.0024 | 0.0005 |
|           | envir. residuals, no PC | 0.0104                                 | 0.0125 | 0.0045 | 0.0015          | 0.0018 | 0.0003 |
| (1,1)     | original trait          | 0.1734                                 | 0.1279 | 0.1849 | 0.0672          | 0.0414 | 0.0712 |
|           | original trait, no PC   | 0.3405                                 | 0.1901 | 0.2549 | 0.1946          | 0.0762 | 0.1179 |
|           | GRAMMAR+                | 0.0585                                 | 0.0543 | 0.0502 | 0.0138          | 0.0115 | 0.0097 |
|           | GRAMMAR+, no PC         | 0.0828                                 | 0.0563 | 0.0501 | 0.0240          | 0.0121 | 0.0101 |
|           | envir. residuals        | 0.0157                                 | 0.0224 | 0.0097 | 0.0020          | 0.0030 | 0.0008 |
|           | envir. residuals, no PC | 0.0124                                 | 0.0167 | 0.0067 | 0.0013          | 0.0020 | 0.0005 |
| (1,25)    | original trait          | 0.2080                                 | 0.1549 | 0.2290 | 0.0908          | 0.0538 | 0.0994 |
|           | original trait, no PC   | 0.3255                                 | 0.2208 | 0.3004 | 0.1985          | 0.0986 | 0.1559 |
|           | GRAMMAR+                | 0.0613                                 | 0.0546 | 0.0487 | 0.0160          | 0.0115 | 0.0097 |
|           | GRAMMAR+, no PC         | 0.0889                                 | 0.0564 | 0.0491 | 0.0329          | 0.0124 | 0.0097 |
|           | envir. residuals        | 0.0137                                 | 0.0180 | 0.0068 | 0.0019          | 0.0023 | 0.0006 |
|           | envir. residuals, no PC | 0.0117                                 | 0.0135 | 0.0049 | 0.0018          | 0.0015 | 0.0004 |

\* Three sets of parameters of beta distribution define three modes of weight function
