# Supplementary material for: Region-Based Association Analysis of Human Quantitative Traits in Related Individuals
Source: PubMed Central journal article supplement (PMC3684601; doi:10.1371/journal.pone.0065395), 2013-06-17
Supplement: pone.0065395.s003.pdf [file pone.0065395.s003.pdf]

**Table S2. Empirical power at causal genes for various trait presentations of Q1 analyzed with SKAT.**

| Weights*  | Trait presentation      | 5% null<br>quantile** | Proportion of $P$ values $\leq$ 5% null quantile for causal genes |               |             |             |              |            |              | all genes<br>(mean) |
|-----------|-------------------------|-----------------------|-------------------------------------------------------------------|---------------|-------------|-------------|--------------|------------|--------------|---------------------|
|           |                         |                       | <i>ARNT</i>                                                       | <i>ELAVL4</i> | <i>FLT1</i> | <i>FLT4</i> | <i>HIF3A</i> | <i>KDR</i> | <i>VEGFA</i> |                     |
| (0.5,0.5) | original trait          | 0.002                 | 0.074                                                             | 0.024         | 0.975       | 0.040       | 0.051        | 0.568      | 0.975        | 0.387               |
|           | original trait, no PC   | 0.000                 | 0.015                                                             | 0.000         | 0.792       | 0.021       | 0.046        | 0.617      | 1.000        | 0.356               |
|           | GRAMMAR+                | 0.043                 | 0.066                                                             | 0.040         | 0.990       | 0.073       | 0.041        | 0.751      | 0.999        | 0.423               |
|           | GRAMMAR+, no PC         | 0.026                 | 0.038                                                             | 0.018         | 0.984       | 0.102       | 0.056        | 0.836      | 1.000        | 0.433               |
|           | envir. residuals        | 0.184                 | 0.054                                                             | 0.093         | 0.954       | 0.058       | 0.007        | 0.761      | 0.999        | 0.418               |
|           | envir. residuals, no PC | 0.202                 | 0.045                                                             | 0.072         | 0.952       | 0.087       | 0.008        | 0.803      | 1.000        | 0.424               |
| (1,1)     | original trait          | 0.004                 | 0.014                                                             | 0.025         | 0.135       | 0.069       | 0.226        | 0.667      | 0.993        | 0.304               |
|           | original trait, no PC   | 0.000                 | 0.056                                                             | 0.000         | 0.093       | 0.117       | 0.331        | 0.716      | 1.000        | 0.330               |
|           | GRAMMAR+                | 0.042                 | 0.019                                                             | 0.028         | 0.243       | 0.082       | 0.206        | 0.805      | 0.999        | 0.340               |
|           | GRAMMAR+, no PC         | 0.029                 | 0.063                                                             | 0.013         | 0.208       | 0.178       | 0.305        | 0.857      | 1.000        | 0.375               |
|           | envir. residuals        | 0.141                 | 0.038                                                             | 0.042         | 0.225       | 0.064       | 0.130        | 0.838      | 1.000        | 0.334               |
|           | envir. residuals, no PC | 0.160                 | 0.046                                                             | 0.035         | 0.203       | 0.132       | 0.140        | 0.868      | 1.000        | 0.346               |
| (1,25)    | original trait          | 0.002                 | 0.067                                                             | 0.010         | 0.993       | 0.055       | 0.008        | 0.448      | 0.994        | 0.368               |
|           | original trait, no PC   | 0.000                 | 0.003                                                             | 0.000         | 0.875       | 0.047       | 0.001        | 0.172      | 1.000        | 0.300               |
|           | GRAMMAR+                | 0.041                 | 0.061                                                             | 0.015         | 1.000       | 0.079       | 0.010        | 0.642      | 1.000        | 0.401               |
|           | GRAMMAR+, no PC         | 0.024                 | 0.024                                                             | 0.005         | 0.996       | 0.162       | 0.004        | 0.578      | 1.000        | 0.396               |
|           | envir. residuals        | 0.167                 | 0.048                                                             | 0.025         | 0.996       | 0.076       | 0.010        | 0.672      | 1.000        | 0.404               |
|           | envir. residuals, no PC | 0.184                 | 0.049                                                             | 0.020         | 0.997       | 0.146       | 0.005        | 0.667      | 1.000        | 0.412               |

\* Three sets of parameters of beta distribution define three modes of weight function

\*\* 1174×1000 regions were used to approximate the null distribution
