# Supplementary material for: Region-Based Association Analysis of Human Quantitative Traits in Related Individuals
Source: PubMed Central journal article supplement (PMC3684601; doi:10.1371/journal.pone.0065395), 2013-06-17
Supplement: pone.0065395.s004.pdf [file pone.0065395.s004.pdf]

**Table S3. Empirical power at causal genes for various trait presentations of Q2 analyzed with SKAT.**

| Weights*  | Trait presentation      | 5% null quantile** | Proportion of $P$ values $\leq$ 5% null quantile for causal genes |               |            |              |             |              |               |              |             |             |            | all genes (mean) |
|-----------|-------------------------|--------------------|-------------------------------------------------------------------|---------------|------------|--------------|-------------|--------------|---------------|--------------|-------------|-------------|------------|------------------|
|           |                         |                    | <i>BCHE</i>                                                       | <i>INSIG1</i> | <i>LPL</i> | <i>PDGFD</i> | <i>PLAT</i> | <i>SIRT1</i> | <i>SREBF1</i> | <i>VLDLR</i> | <i>VNN1</i> | <i>VNN3</i> | <i>VWF</i> |                  |
| (0.5,0.5) | original trait          | 0.007              | 0.080                                                             | 0.016         | 0.388      | 0.039        | 0.036       | 0.183        | 0.294         | 0.219        | 0.571       | 0.387       | 0.038      | 0.205            |
|           | original trait, no PC   | 0.002              | 0.077                                                             | 0.001         | 0.511      | 0.039        | 0.088       | 0.310        | 0.209         | 0.390        | 0.727       | 0.284       | 0.001      | 0.240            |
|           | GRAMMAR+                | 0.048              | 0.146                                                             | 0.033         | 0.318      | 0.051        | 0.029       | 0.182        | 0.323         | 0.220        | 0.597       | 0.378       | 0.128      | 0.219            |
|           | GRAMMAR+, no PC         | 0.044              | 0.106                                                             | 0.029         | 0.448      | 0.051        | 0.045       | 0.232        | 0.283         | 0.319        | 0.777       | 0.366       | 0.085      | 0.249            |
|           | envir. residuals        | 0.128              | 0.130                                                             | 0.055         | 0.202      | 0.056        | 0.018       | 0.143        | 0.317         | 0.197        | 0.575       | 0.327       | 0.233      | 0.205            |
|           | envir. residuals, no PC | 0.148              | 0.106                                                             | 0.065         | 0.265      | 0.049        | 0.025       | 0.172        | 0.261         | 0.219        | 0.703       | 0.297       | 0.236      | 0.218            |
| (1,1)     | original trait          | 0.012              | 0.014                                                             | 0.034         | 0.159      | 0.036        | 0.023       | 0.118        | 0.127         | 0.041        | 0.809       | 0.260       | 0.041      | 0.151            |
|           | original trait, no PC   | 0.004              | 0.013                                                             | 0.019         | 0.228      | 0.032        | 0.103       | 0.560        | 0.072         | 0.076        | 0.861       | 0.115       | 0.006      | 0.190            |
|           | GRAMMAR+                | 0.047              | 0.028                                                             | 0.029         | 0.166      | 0.037        | 0.038       | 0.088        | 0.155         | 0.043        | 0.838       | 0.303       | 0.073      | 0.164            |
|           | GRAMMAR+, no PC         | 0.044              | 0.029                                                             | 0.024         | 0.231      | 0.033        | 0.093       | 0.283        | 0.136         | 0.049        | 0.908       | 0.237       | 0.042      | 0.188            |
|           | envir. residuals        | 0.102              | 0.038                                                             | 0.029         | 0.149      | 0.043        | 0.055       | 0.062        | 0.145         | 0.045        | 0.838       | 0.328       | 0.128      | 0.169            |
|           | envir. residuals, no PC | 0.120              | 0.042                                                             | 0.042         | 0.169      | 0.028        | 0.073       | 0.112        | 0.164         | 0.049        | 0.886       | 0.284       | 0.114      | 0.179            |
| (1,25)    | original trait          | 0.008              | 0.018                                                             | 0.008         | 0.440      | 0.036        | 0.027       | 0.118        | 0.430         | 0.231        | 0.126       | 0.180       | 0.031      | 0.150            |
|           | original trait, no PC   | 0.002              | 0.055                                                             | 0.001         | 0.522      | 0.031        | 0.048       | 0.471        | 0.352         | 0.289        | 0.046       | 0.112       | 0.003      | 0.176            |
|           | GRAMMAR+                | 0.047              | 0.056                                                             | 0.028         | 0.386      | 0.048        | 0.028       | 0.103        | 0.466         | 0.252        | 0.112       | 0.204       | 0.081      | 0.160            |
|           | GRAMMAR+, no PC         | 0.044              | 0.036                                                             | 0.025         | 0.515      | 0.048        | 0.046       | 0.257        | 0.398         | 0.290        | 0.100       | 0.156       | 0.042      | 0.174            |
|           | envir. residuals        | 0.119              | 0.079                                                             | 0.053         | 0.287      | 0.055        | 0.027       | 0.075        | 0.470         | 0.221        | 0.100       | 0.172       | 0.155      | 0.154            |
|           | envir. residuals, no PC | 0.139              | 0.053                                                             | 0.071         | 0.364      | 0.051        | 0.030       | 0.120        | 0.379         | 0.225        | 0.115       | 0.133       | 0.147      | 0.154            |

\* Three sets of parameters of beta distribution define three modes of weight function

\*\* 641×1000 regions were used to approximate the null distribution
