# Supplementary material for: Region-Based Association Analysis of Human Quantitative Traits in Related Individuals
Source: PubMed Central journal article supplement (PMC3684601; doi:10.1371/journal.pone.0065395), 2013-06-17
Supplement: pone.0065395.s005.pdf [file pone.0065395.s005.pdf]

**Table S4. Type I errors for human height, body mass index (BMI), high- and low-density lipoprotein cholesterol (HDL, LDL), total cholesterol (TC) and triglyceride (TG) levels analyzed with SKAT.**

| Weights*  | Trait presentation | Proportion of $P$ values $\leq \alpha$ |        |        |        |        |        |                 |        |        |        |        |        |
|-----------|--------------------|----------------------------------------|--------|--------|--------|--------|--------|-----------------|--------|--------|--------|--------|--------|
|           |                    | $\alpha = 0.05$                        |        |        |        |        |        | $\alpha = 0.01$ |        |        |        |        |        |
|           |                    | height                                 | BMI    | HDL    | LDL    | TC     | TG     | height          | BMI    | HDL    | LDL    | TC     | TG     |
| (0.5,0.5) | original trait     | 0.6921                                 | 0.1648 | 0.1783 | 0.1307 | 0.1482 | 0.1250 | 0.4750          | 0.0532 | 0.0584 | 0.0373 | 0.0461 | 0.0366 |
|           | original trait PC  | 0.2895                                 | 0.1390 | 0.1282 | 0.0867 | 0.0924 | 0.0841 | 0.1229          | 0.0405 | 0.0369 | 0.0216 | 0.0228 | 0.0198 |
|           | GRAMMAR+           | 0.0799                                 | 0.0515 | 0.0479 | 0.0538 | 0.0563 | 0.0501 | 0.0193          | 0.0097 | 0.0092 | 0.0120 | 0.0128 | 0.0107 |
|           | envir. residuals   | 0.0040                                 | 0.0159 | 0.0128 | 0.0270 | 0.0273 | 0.0241 | 0.0003          | 0.0021 | 0.0017 | 0.0051 | 0.0046 | 0.0043 |
| (1,1)     | original trait     | 0.6566                                 | 0.1563 | 0.1682 | 0.1243 | 0.1419 | 0.1210 | 0.4323          | 0.0497 | 0.0553 | 0.0357 | 0.0440 | 0.0337 |
|           | original trait PC  | 0.2705                                 | 0.1323 | 0.1235 | 0.0842 | 0.0890 | 0.0812 | 0.1130          | 0.0382 | 0.0349 | 0.0209 | 0.0221 | 0.0183 |
|           | GRAMMAR+           | 0.0780                                 | 0.0521 | 0.0485 | 0.0549 | 0.0574 | 0.0496 | 0.0191          | 0.0100 | 0.0088 | 0.0118 | 0.0130 | 0.0103 |
|           | envir. residuals   | 0.0053                                 | 0.0176 | 0.0143 | 0.0292 | 0.0287 | 0.0235 | 0.0003          | 0.0025 | 0.0015 | 0.0049 | 0.0047 | 0.0041 |
| (1,25)    | original trait     | 0.3851                                 | 0.1119 | 0.1153 | 0.0906 | 0.1004 | 0.0944 | 0.2132          | 0.0341 | 0.0345 | 0.0245 | 0.0283 | 0.0266 |
|           | original trait PC  | 0.1685                                 | 0.0970 | 0.0897 | 0.0708 | 0.0733 | 0.0731 | 0.0625          | 0.0287 | 0.0242 | 0.0159 | 0.0166 | 0.0188 |
|           | GRAMMAR+           | 0.0659                                 | 0.0508 | 0.0458 | 0.0501 | 0.0513 | 0.0525 | 0.0155          | 0.0104 | 0.0100 | 0.0103 | 0.0106 | 0.0106 |
|           | envir. residuals   | 0.0103                                 | 0.0246 | 0.0216 | 0.0313 | 0.0313 | 0.0320 | 0.0004          | 0.0044 | 0.0040 | 0.0054 | 0.0051 | 0.0050 |

\* Three sets of parameters of beta distribution define three modes of weight function
